# Supplementary material for: ABCB1 and ABCC1 Function during TGF-β-Induced Epithelial-Mesenchymal Transition: Relationship between Multidrug Resistance and Tumor Progression
Source: MDPI journal article supplement (doi:10.3390/ijms24076046), 2023-03-23
Supplement: s1 [file s1]

**A**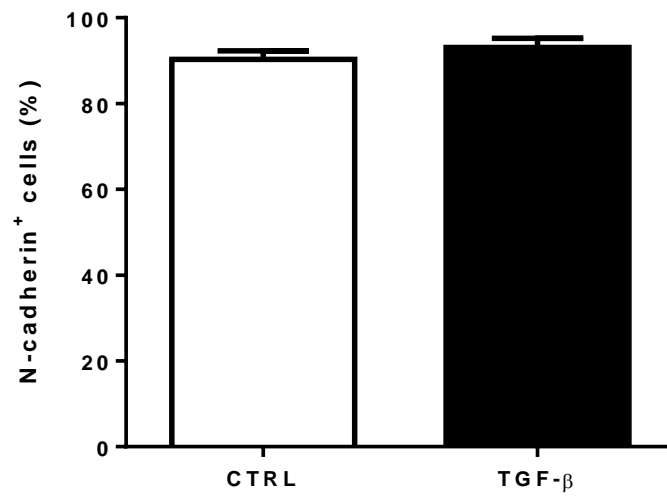**B**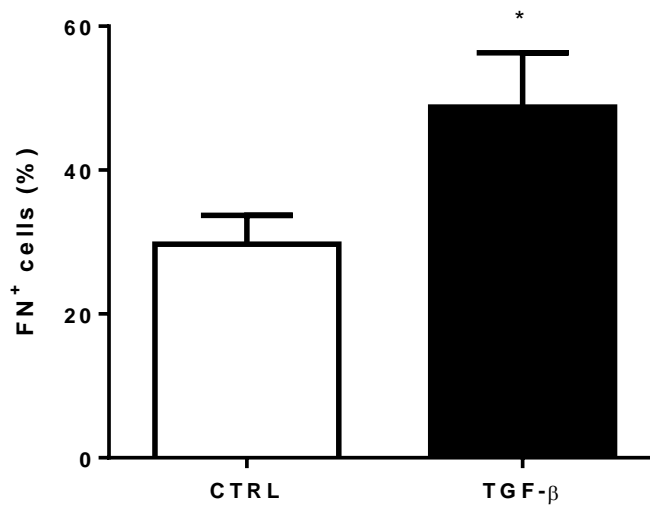

**Supplementary Figure S1.** Percentage of positive cells for N-cadherin and fibronectin (FN) after TGF- $\beta$  treatment. A549 cells ( $1 \times 10^5$  cells/mL) were incubated with 5 ng/mL TGF- $\beta$  for epithelial-mesenchymal transition induction. After 48 h, the cells were stained with antibodies against (A) N-cadherin and (B) FN and evaluated by flow cytometry. Bars represent mean + SEM, and the values of significance were represented by (\*) for  $p < 0.05$  from at least four independent experiments.

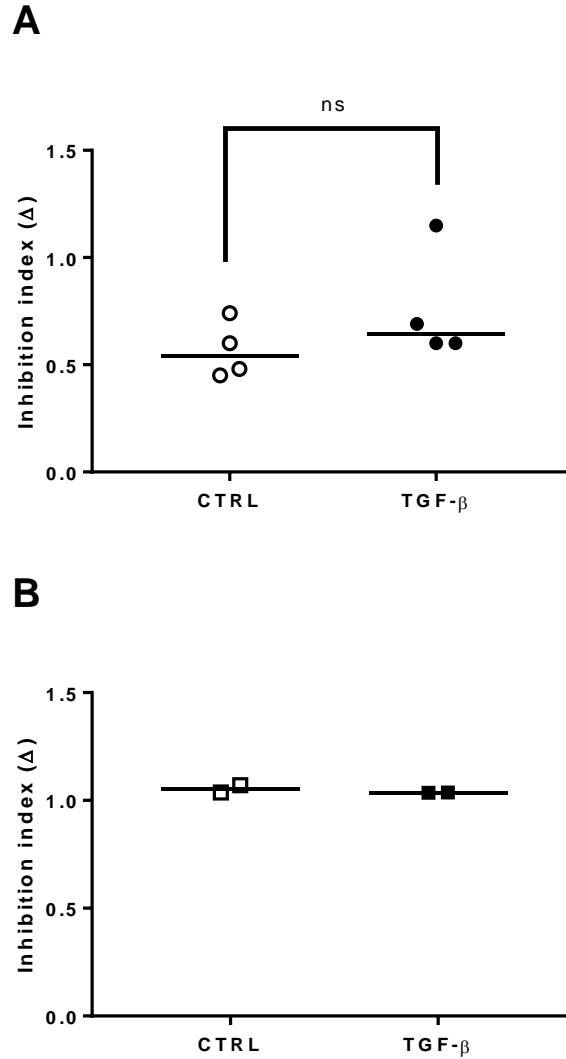

**Supplementary Figure S2.** ABCC1 activity after TGF- $\beta$  treatment. A549 cells ( $1 \times 10^5$  cells/mL) were incubated with 5 ng/mL TGF- $\beta$  for EMT induction. After 48 h, ABCB1-mediated efflux assays were performed as described in Material and Methods. ABCB1 activity is represented by inhibition index ( $\Delta$ ). ABCB1 activity in the presence of (A) 10  $\mu$ M verapamil and (B) 1  $\mu$ M cyclosporin A. ns = not significant. (A)  $n = 4$  and (B)  $n = 2$  independent experiments. The inhibition index was calculated as the ratio of MFI in the presence of inhibitor to the one in the absence (Control), in which values under or equal 1 represent no efflux and values higher than 1 indicate the level of ABCB1 activity.
